# Supplementary material for: A Mendelian randomization study of the role of lipoprotein subfractions in coronary artery disease
Source: eLife journal article supplement (doi:10.7554/elife.58361), 2021-04-26
Supplement: supp [file elife-58361-supp-v1.zip]

Archive with 12 entries (12 files):
- elife_poa_e58361_Transparent_Reporting_File.docx
- elife_poa_e58361_Appendix_2_figure_1.pdf
- elife_poa_e58361_Appendix_2_figure_2.pdf
- elife_poa_e58361_Appendix_2_figure_1.pdf
- elife_poa_e58361_Appendix_3_figure_1.pdf
- elife_poa_e58361_Appendix_4_figure_1.pdf
- elife_poa_e58361_Appendix_4_figure_2.pdf
- elife_poa_e58361_Appendix_4_figure_3.pdf
- elife_poa_e58361_Appendix_4_figure_4.pdf
- elife_poa_e58361_Figure_3_source_data_1.txt
- elife_poa_e58361_Figure_1_source_data_1.txt
- elife_poa_e58361_Figure_1_source_data_2.txt
