# Supplementary material for: A Mendelian randomization study of the role of lipoprotein subfractions in coronary artery disease
Source: eLife journal article supplement (doi:10.7554/elife.58361), 2021-04-26
Supplement: supp [file elife-58361-supp-v1.zip › elife_poa_e58361_Figure_1_source_data_1.txt]

"XS.VLDL.PL" "XS.VLDL.L" "LDL.D" "L.LDL.PL" "L.LDL.P" "L.LDL.L" "L.LDL.FC" "L.LDL.CE" "L.LDL.C" "M.LDL.P" "M.LDL.L" "M.LDL.CE" "S.LDL.P" "S.LDL.L" "S.LDL.C" "IDL.L" "IDL.FC" "IDL.C" "HDL.D" "XL.HDL.TG" "L.HDL.PL" "M.HDL.PL" "M.HDL.P" "M.HDL.L" "M.HDL.CE" "S.HDL.P" "S.HDL.L" "ApoA1" "ApoB" "HDL.C" "LDL.C" "TG"
"XS.VLDL.PL" 1 1 0.418953887133735 0.7329 0.9838 0.9663 0.6674 0.9341 0.7168 0.934 0.9269 0.9133 0.913000111681984 0.9117 0.6817 1 0.838736249262702 0.993173389887758 -0.0528247454565184 0.713291531871151 -0.128519710736338 0.217066315950755 0.182298823529412 -0.0845 -0.265445738070863 -0.010212634188015 0.1861 0.207093134879012 0.779598121916612 -0.153946141296982 0.738510508698081 0.570538125250465
"XS.VLDL.L" 1 1 -0.2836 0.6713 0.8762 0.846 0.5556 0.8048 0.6238 0.8587 0.8407 0.81 0.8776 0.8677 0.6711 0.9149 0.5868 0.8284 -0.2398 0.5538 -0.3288 0.1367 0.0683 -0.0734 -0.4289 0.3229 0.2988 0.2532 0.7968 -0.1965 0.6114 0.7267
"LDL.D" 0.418953887133735 -0.2836 1 -0.2832 -0.4048 -0.3903 -0.1608 -0.4033 -0.2077 -0.5532 -0.5445 -0.4918 -0.551126571968478 -0.6238 -0.4762 -0.2506 0.211606919150977 -0.0019797892969991 0.36997590580025 0.127267622543325 0.353799775741142 0.0218449223036016 -0.0215275223509475 -0.2781 -0.0778903054097452 -0.694024669891867 -0.8855 -0.328021720616427 -0.222484495871542 -0.150802025009425 -0.148719318993621 -0.372579483535984
"L.LDL.PL" 0.7329 0.6713 -0.2832 1 0.6275 0.6257 0.9569 0.6231 0.9868 0.6189 0.63 0.629 0.6333 0.6158 0.0797 0.6453 0.5931 0.6444 -0.0135 0.4422 -0.0602 0.2842 0.044 -0.0399 -0.2815 0.0172 0.1145 0.2713 0.6102 0.24 0.6737 0.2713
"L.LDL.P" 0.9838 0.8762 -0.4048 0.6275 1 0.9979 0.6034 0.9907 0.6255 0.99 1 0.9871 0.9645 0.9661 0.6598 0.9794 0.607 0.9808 -0.1096 0.4395 -0.1736 0.1062 0.0389 -0.0611 -0.3421 0.2631 0.3795 0.3137 0.6289 0.0226 0.6533 0.4727
"L.LDL.L" 0.9663 0.846 -0.3903 0.6257 0.9979 1 0.6098 0.9968 0.6259 0.9871 1 0.9916 0.9532 0.9587 0.6566 0.973 0.6112 0.9838 -0.1008 0.4144 -0.1563 0.1076 0.0395 -0.0528 -0.3202 0.2607 0.3884 0.3115 0.6072 0.0415 0.6548 0.4392
"L.LDL.FC" 0.6674 0.5556 -0.1608 0.9569 0.6034 0.6098 1 0.6123 0.9961 0.5796 0.5989 0.6011 0.5635 0.5495 0.0867 0.6177 0.6061 0.6435 0.1152 0.4079 0.0736 0.2832 0.0667 0.0028 -0.1919 -0.0215 0.0934 0.3138 0.5653 0.3265 0.701 0.1322
"L.LDL.CE" 0.9341 0.8048 -0.4033 0.6231 0.9907 0.9968 0.6123 1 0.6204 0.9835 1 0.9974 0.9409 0.9506 0.6621 0.9539 0.6035 0.9714 -0.1148 0.3655 -0.1569 0.1172 0.047 -0.0363 -0.2923 0.2965 0.4361 0.298 0.5772 0.0508 0.6528 0.4147
"L.LDL.C" 0.7168 0.6238 -0.2077 0.9868 0.6255 0.6259 0.9961 0.6204 1 0.606 0.6233 0.6208 0.5975 0.5827 0.1087 0.6422 0.6322 0.6436 0.0141 0.3664 -0.0183 0.3051 0.0762 0.0023 -0.2309 0.0637 0.1797 0.2512 0.5781 0.246 0.6841 0.2269
"M.LDL.P" 0.934 0.8587 -0.5532 0.6189 0.99 0.9871 0.5796 0.9835 0.606 1 1 0.9938 0.9949 1 0.6832 0.9419 0.5574 0.9406 -0.1987 0.3926 -0.2547 0.101 0.0437 -0.0525 -0.3207 0.3735 0.4742 0.2877 0.6335 -0.0065 0.6469 0.5121
"M.LDL.L" 0.9269 0.8407 -0.5445 0.63 1 1 0.5989 1 0.6233 1 1 1 0.9955 1 0.6981 0.9477 0.5883 0.957 -0.1904 0.3848 -0.2439 0.0921 0.0298 -0.0605 -0.3156 0.3606 0.4756 0.2931 0.6331 0.0072 0.6642 0.4966
"M.LDL.CE" 0.9133 0.81 -0.4918 0.629 0.9871 0.9916 0.6011 0.9974 0.6208 0.9938 1 1 0.9617 0.9723 0.6717 0.9384 0.5792 0.9541 -0.1643 0.3631 -0.1993 0.138 0.0699 -0.0126 -0.2586 0.3787 0.4988 0.3005 0.6051 0.052 0.6523 0.4503
"S.LDL.P" 0.913000111681984 0.8776 -0.551126571968478 0.6333 0.9645 0.9532 0.5635 0.9409 0.5975 0.9949 0.9955 0.9617 1 0.9975 0.6855 0.9169 0.52489278252733 0.893563454390293 -0.22665541935956 0.4135 -0.26824958889068 0.161565130344223 0.139172190122309 0.0197 -0.227436717382791 0.468979529873568 0.559 0.335023467574792 0.677742550096221 -0.0230479272067525 0.628941153920306 0.577283344999412
"S.LDL.L" 0.9117 0.8677 -0.6238 0.6158 0.9661 0.9587 0.5495 0.9506 0.5827 1 1 0.9723 0.9975 1 0.6785 0.9091 0.5215 0.8962 -0.2872 0.3881 -0.3226 0.1049 0.0646 -0.035 -0.3099 0.4697 0.5428 0.2649 0.6564 -0.0648 0.6162 0.5823
"S.LDL.C" 0.6817 0.6711 -0.4762 0.0797 0.6598 0.6566 0.0867 0.6621 0.1087 0.6832 0.6981 0.6717 0.6855 0.6785 1 0.6311 0.4298 0.6337 -0.2606 0.0868 -0.2804 -0.0514 0.067 -0.0116 -0.2173 0.3566 0.4137 0.1094 0.656 -0.1606 0.4403 0.5812
"IDL.L" 1 0.9149 -0.2506 0.6453 0.9794 0.973 0.6177 0.9539 0.6422 0.9419 0.9477 0.9384 0.9169 0.9091 0.6311 1 0.653 0.9887 -0.0139 0.507 -0.0828 0.1646 0.0916 -0.0177 -0.3243 0.2005 0.2912 0.383 0.6465 0.049 0.6442 0.4709
"IDL.FC" 0.838736249262702 0.5868 0.211606919150977 0.5931 0.607 0.6112 0.6061 0.6035 0.6322 0.5574 0.5883 0.5792 0.52489278252733 0.5215 0.4298 0.653 1 0.77956892302783 0.242311326711075 0.541396770032013 0.205563226634032 0.230916283512105 0.201031877936438 0.074 -0.0845655951380611 -0.0992989136436698 0.0781 0.231004348974862 0.77943136087747 -0.0501526821203758 0.612584551436844 0.444819084737122
"IDL.C" 0.993173389887758 0.8284 -0.0019797892969991 0.6444 0.9808 0.9838 0.6435 0.9714 0.6436 0.9406 0.957 0.9541 0.893563454390293 0.8962 0.6337 0.9887 0.77956892302783 1 0.104720253025519 0.4809 0.0326439089933197 0.230797870197298 0.163505425978591 0.0171 -0.21432386202808 0.0959058721496759 0.2918 0.377624387210708 0.578055915191267 0.0748996580589424 0.799679876610489 0.385630405179214
"HDL.D" -0.0528247454565184 -0.2398 0.36997590580025 -0.0135 -0.1096 -0.1008 0.1152 -0.1148 0.0141 -0.1987 -0.1904 -0.1643 -0.22665541935956 -0.2872 -0.2606 -0.0139 0.242311326711075 0.104720253025519 1 0.382709385529712 0.960080418063894 0.345977761035981 0.32599560545346 0.3133 0.459301645521602 -0.453730509350551 -0.4274 0.703577190525921 -0.363736816484628 0.798586058706937 -0.0774136901182085 -0.63751715293689
"XL.HDL.TG" 0.713291531871151 0.5538 0.127267622543325 0.4422 0.4395 0.4144 0.4079 0.3655 0.3664 0.3926 0.3848 0.3631 0.4135 0.3881 0.0868 0.507 0.541396770032013 0.4809 0.382709385529712 1 0.323698716103959 0.388619303606821 0.37128963823178 0.1663 0.09068181862092 0.0413634399531534 0.0087 0.717991603338074 0.493415379504532 0.325855605785532 0.1299 0.296168660339652
"L.HDL.PL" -0.128519710736338 -0.3288 0.353799775741142 -0.0602 -0.1736 -0.1563 0.0736 -0.1569 -0.0183 -0.2547 -0.2439 -0.1993 -0.26824958889068 -0.3226 -0.2804 -0.0828 0.205563226634032 0.0326439089933197 0.960080418063894 0.323698716103959 1 0.55555070510179 0.579377385090613 0.6319 0.716786537637874 -0.19358235874694 -0.124 0.768086575829177 -0.337938010063488 0.786157301232917 -0.118325616909637 -0.608009124005291
"M.HDL.PL" 0.217066315950755 0.1367 0.0218449223036016 0.2842 0.1062 0.1076 0.2832 0.1172 0.3051 0.101 0.0921 0.138 0.161565130344223 0.1049 -0.0514 0.1646 0.230916283512105 0.230797870197298 0.345977761035981 0.388619303606821 0.55555070510179 1 0.995123722596112 0.594 0.902697344494155 0.438430896613692 0.4066 0.687688154729659 0.0418928634195829 0.652991878042064 0.0238292020046624 -0.044434995697467
"M.HDL.P" 0.182298823529412 0.0683 -0.0215275223509475 0.044 0.0389 0.0395 0.0667 0.047 0.0762 0.0437 0.0298 0.0699 0.139172190122309 0.0646 0.067 0.0916 0.201031877936438 0.163505425978591 0.32599560545346 0.37128963823178 0.579377385090613 0.995123722596112 1 0.9903 0.925628102194702 0.652078281092838 0.7024 0.750617789893443 0.152216325153679 0.45577654544118 0.0789256292370447 0.000163302014099403
"M.HDL.L" -0.0845 -0.0734 -0.2781 -0.0399 -0.0611 -0.0528 0.0028 -0.0363 0.0023 -0.0525 -0.0605 -0.0126 0.0197 -0.035 -0.0116 -0.0177 0.074 0.0171 0.3133 0.1663 0.6319 0.594 0.9903 1 0.9637 0.5996 0.6784 0.7098 0.0193 0.52 -0.0282 -0.191
"M.HDL.CE" -0.265445738070863 -0.4289 -0.0778903054097452 -0.2815 -0.3421 -0.3202 -0.1919 -0.2923 -0.2309 -0.3207 -0.3156 -0.2586 -0.227436717382791 -0.3099 -0.2173 -0.3243 -0.0845655951380611 -0.21432386202808 0.459301645521602 0.09068181862092 0.716786537637874 0.902697344494155 0.925628102194702 0.9637 1 0.61005466329591 0.622 0.684245250130691 -0.228982648665212 0.574612691481286 -0.244763521915331 -0.31623514793979
"S.HDL.P" -0.010212634188015 0.3229 -0.694024669891867 0.0172 0.2631 0.2607 -0.0215 0.2965 0.0637 0.3735 0.3606 0.3787 0.468979529873568 0.4697 0.3566 0.2005 -0.0992989136436698 0.0959058721496759 -0.453730509350551 0.0413634399531534 -0.19358235874694 0.438430896613692 0.652078281092838 0.5996 0.61005466329591 1 1 0.356739336294963 0.274019550364905 -0.00665084867257061 0.0988578207193151 0.480211565928424
"S.HDL.L" 0.1861 0.2988 -0.8855 0.1145 0.3795 0.3884 0.0934 0.4361 0.1797 0.4742 0.4756 0.4988 0.559 0.5428 0.4137 0.2912 0.0781 0.2918 -0.4274 0.0087 -0.124 0.4066 0.7024 0.6784 0.622 1 1 0.3145 0.3418 0.1305 0.2714 0.195
"ApoA1" 0.207093134879012 0.2532 -0.328021720616427 0.2713 0.3137 0.3115 0.3138 0.298 0.2512 0.2877 0.2931 0.3005 0.335023467574792 0.2649 0.1094 0.383 0.231004348974862 0.377624387210708 0.703577190525921 0.717991603338074 0.768086575829177 0.687688154729659 0.750617789893443 0.7098 0.684245250130691 0.356739336294963 0.3145 1 0.139508391215245 0.819975629130386 0.15863309328748 -0.0655548305613774
"ApoB" 0.779598121916612 0.7968 -0.222484495871542 0.6102 0.6289 0.6072 0.5653 0.5772 0.5781 0.6335 0.6331 0.6051 0.677742550096221 0.6564 0.656 0.6465 0.77943136087747 0.578055915191267 -0.363736816484628 0.493415379504532 -0.337938010063488 0.0418928634195829 0.152216325153679 0.0193 -0.228982648665212 0.274019550364905 0.3418 0.139508391215245 1 -0.283157760715327 0.858571492314042 0.785109214996839
"HDL.C" -0.153946141296982 -0.1965 -0.150802025009425 0.24 0.0226 0.0415 0.3265 0.0508 0.246 -0.0065 0.0072 0.052 -0.0230479272067525 -0.0648 -0.1606 0.049 -0.0501526821203758 0.0748996580589424 0.798586058706937 0.325855605785532 0.786157301232917 0.652991878042064 0.45577654544118 0.52 0.574612691481286 -0.00665084867257061 0.1305 0.819975629130386 -0.283157760715327 1 -0.00663860818876567 -0.51350383638925
"LDL.C" 0.738510508698081 0.6114 -0.148719318993621 0.6737 0.6533 0.6548 0.701 0.6528 0.6841 0.6469 0.6642 0.6523 0.628941153920306 0.6162 0.4403 0.6442 0.612584551436844 0.799679876610489 -0.0774136901182085 0.1299 -0.118325616909637 0.0238292020046624 0.0789256292370447 -0.0282 -0.244763521915331 0.0988578207193151 0.2714 0.15863309328748 0.858571492314042 -0.00663860818876567 1 0.322262655504787
"TG" 0.570538125250465 0.7267 -0.372579483535984 0.2713 0.4727 0.4392 0.1322 0.4147 0.2269 0.5121 0.4966 0.4503 0.577283344999412 0.5823 0.5812 0.4709 0.444819084737122 0.385630405179214 -0.63751715293689 0.296168660339652 -0.608009124005291 -0.044434995697467 0.000163302014099403 -0.191 -0.31623514793979 0.480211565928424 0.195 -0.0655548305613774 0.785109214996839 -0.51350383638925 0.322262655504787 1
