# Supplementary material for: A Mendelian randomization study of the role of lipoprotein subfractions in coronary artery disease
Source: eLife journal article supplement (doi:10.7554/elife.58361), 2021-04-26
Supplement: supp [file elife-58361-supp-v1.zip › elife_poa_e58361_Figure_1_source_data_2.txt]

"XS.VLDL.PL" "XS.VLDL.L" "LDL.D" "L.LDL.PL" "L.LDL.P" "L.LDL.L" "L.LDL.FC" "L.LDL.CE" "L.LDL.C" "M.LDL.P" "M.LDL.L" "M.LDL.CE" "S.LDL.P" "S.LDL.L" "S.LDL.C" "IDL.L" "IDL.FC" "IDL.C" "HDL.D" "XL.HDL.TG" "L.HDL.PL" "M.HDL.PL" "M.HDL.P" "M.HDL.L" "M.HDL.CE" "S.HDL.P" "S.HDL.L" "ApoA1" "ApoB" "HDL.C" "LDL.C" "TG"
"XS.VLDL.PL" 1 2.54916881695805e-217 0.0338773719490141 1.44294133720905e-08 7.54602117258015e-66 6.38012042681898e-54 1.81552431779529e-05 1.95829022914562e-36 1.17169915417079e-07 2.03614907752423e-39 2.35602484446234e-35 1.51492403612498e-30 5.16854562827799e-35 2.66493309834438e-30 9.70018993353685e-06 7.35272943164854e-119 1.25469886347292e-26 1.49120599233865e-82 0.699744816485621 8.45940034667567e-09 0.335687766699575 0.284493135372638 0.384336580989651 0.759567693396253 0.16307584143625 0.966348131796567 0.516997561741446 0.275072936159976 2.41615868162892e-17 0.29042737681044 1.23165804441325e-07 3.10958765846123e-07
"XS.VLDL.L" 2.54916881695805e-217 1 0.370376935012378 4.41064654904788e-09 7.4382761010257e-30 3.11399823881743e-24 0.000162013023312624 8.46758687971561e-19 8.84740751030267e-07 2.95343882245276e-25 2.23878559896468e-22 6.03827313541837e-19 1.42986380223852e-35 6.68639101085607e-27 2.12092697038315e-08 4.84621000239705e-66 5.50716965769345e-05 3.65252789666454e-29 0.12424936212482 0.000416130646322746 0.0190157987174307 0.554172846947514 0.78710853983646 0.769957660285751 0.0409211616798936 0.20843205218495 0.203362228957561 0.263407055608077 1.24835173852787e-21 0.234538951733472 7.38066086325758e-06 1.98824239828311e-15
"LDL.D" 0.0338773719490141 0.370376935012378 1 0.429294723631469 0.262543957992945 0.273195752949974 0.641539650129134 0.245406784137123 0.534281125732777 0.0955607248703198 0.0959868849834106 0.131640541176929 0.0278698031695725 0.0306013481697191 0.106120140199962 0.500414915068675 0.433867167271663 0.995013722878846 0.0360293173084569 0.564210467725519 0.0409491869724555 0.921717719358022 0.923855039984447 0.427258918326042 0.747431088690169 0.00297000893705487 0.0104898710578341 0.182630293613041 0.323252163388976 0.464646057487827 0.6046434509302 0.0215005082209998
"L.LDL.PL" 1.44294133720905e-08 4.41064654904788e-09 0.429294723631469 1 0.00442993148655186 0.00519718201004999 2.15815394509093e-283 0.0051630860154169 0 0.00441574732319128 0.00252662683459314 0.00300739413905963 0.000523885854371409 0.00276951642103845 0.882965530056097 0.00126022155353679 0.0087411348943959 0.0019089349231611 0.946075977841563 0.0286677281596573 0.748548568251127 0.326084187110841 0.882969090573302 0.894228430326094 0.320395089301662 0.961776642476472 0.739685921025484 0.274942780373332 0.00242293572120254 0.283761760257198 0.000610840305756798 0.181616230560414
"L.LDL.P" 7.54602117258015e-66 7.4382761010257e-30 0.262543957992945 0.00442993148655186 1 0 0.00998263001176446 0 0.0043055696295649 0 0 0 6.27666302534667e-299 0 0.0010957216565776 0 0.00517479549757927 0 0.564046123210357 0.0257585601160934 0.334823148829487 0.699257987748758 0.894629890231283 0.834423401136022 0.197736526881031 0.397259879610038 0.172064817791207 0.170727799557182 0.000992408259078612 0.913601174903833 0.00159093287638858 0.00373162660076808
"L.LDL.L" 6.38012042681898e-54 3.11399823881743e-24 0.273195752949974 0.00519718201004999 0 1 0.00895409181389726 0 0.00473605834497282 0 0 0 4.76603260709869e-229 3.30129543172343e-268 0.00139766018387093 0 0.00467929746717234 0 0.598248403926006 0.0407150902710152 0.392791824484351 0.697995751580615 0.893840710700631 0.857807946470942 0.235825008233031 0.405047043093867 0.161772369931576 0.175625434582412 0.00272616282163844 0.843783691372629 0.001695126908862 0.00952313197122874
"L.LDL.FC" 1.81552431779529e-05 0.000162013023312624 0.641539650129134 2.15815394509093e-283 0.00998263001176446 0.00895409181389726 1 0.00765745283659961 0 0.0153039764805237 0.00793793021783508 0.00837900268951955 0.00876902055372629 0.0213866135580497 0.871380852839927 0.00387948880621159 0.00517931830934178 0.00197643955354732 0.604305742425915 0.0462973530903962 0.723454182492006 0.345812368510671 0.826050785375392 0.992651167160806 0.508586467352935 0.952977012322806 0.789108464748536 0.193998480425101 0.0102520022938655 0.157352492806031 0.000105660116825547 0.557705663607759
"L.LDL.CE" 1.95829022914562e-36 8.46758687971561e-19 0.245406784137123 0.0051630860154169 0 0 0.00765745283659961 1 0.00542224970856488 0 0 0 6.50457043183215e-162 8.26363530166182e-199 0.000947930016439725 1.04114995608363e-202 0.0054602929451715 0 0.541868847220713 0.081920882786899 0.392012264231955 0.673771868568886 0.874134390360356 0.902297503487242 0.287647854681814 0.335088956884187 0.102398909834216 0.199747265943898 0.00750732431456802 0.810447385561189 0.00170713265064634 0.0157848155440087
"L.LDL.C" 1.17169915417079e-07 8.84740751030267e-07 0.534281125732777 0 0.0043055696295649 0.00473605834497282 0 0.00542224970856488 1 0.00652960953022799 0.00310818304434299 0.00386732803547263 0.00256003660902872 0.00840235590432887 0.834700170334087 0.00116073905853508 0.00161536933874262 0.00174598025970437 0.944185755648296 0.080015312959582 0.923868956779577 0.308992135991973 0.799233580730295 0.993864538936365 0.411076491681101 0.853345118685695 0.577148242377711 0.304626218760805 0.00672290185568 0.265223233692039 0.000308421029949231 0.270930657286227
"M.LDL.P" 2.03614907752423e-39 2.95343882245276e-25 0.0955607248703198 0.00441574732319128 0 0 0.0153039764805237 0 0.00652960953022799 1 0 0 0 0 0.000232289583917941 3.09072805267975e-134 0.0170740563159773 4.9314173668886e-117 0.26402869581268 0.0511376447606603 0.145320559585106 0.709274003420138 0.878304882004098 0.853696032824385 0.22269558334132 0.192347854655124 0.0592630148661374 0.205410989649019 0.000599712684207198 0.975248602894954 0.0016185990806446 0.000656364710968336
"M.LDL.L" 2.35602484446234e-35 2.23878559896468e-22 0.0959868849834106 0.00252662683459314 0 0 0.00793793021783508 0 0.00310818304434299 0 1 0 0 0 6.5677827800504e-05 8.88117245775499e-130 0.00762980784400748 2.06249233649209e-144 0.280970080516435 0.0554439596258033 0.160516319380572 0.731393500061118 0.91563255775943 0.829411937727482 0.226943606526582 0.206572186788799 0.0577164807258164 0.191105786739836 0.000511323896886885 0.97255787868089 0.000582426960440924 0.00106199492522889
"M.LDL.CE" 1.51492403612498e-30 6.03827313541837e-19 0.131640541176929 0.00300739413905963 0 0 0.00837900268951955 0 0.00386732803547263 0 0 1 0 0 0.000430831045349818 3.26220069344424e-103 0.00930044190282825 2.38009913132841e-157 0.362158916953706 0.0768116083436515 0.262320901659582 0.614378373307271 0.809011664936468 0.965200287403057 0.338711245420699 0.198932193567168 0.0478633213178408 0.18324701528016 0.00207425431281293 0.805427752975722 0.00122751515449887 0.00491401252826732
"S.LDL.P" 5.16854562827799e-35 1.42986380223852e-35 0.0278698031695725 0.000523885854371409 6.27666302534667e-299 4.76603260709869e-229 0.00876902055372629 6.50457043183215e-162 0.00256003660902872 0 0 0 1 0 2.85189094390968e-05 4.6015129504886e-63 0.0144477743457746 4.74590132427094e-43 0.148854100600351 0.0211718811013113 0.0880001062390813 0.5037035343744 0.583341153130892 0.940717820481729 0.342951097914326 0.0559409626126586 0.0101664776861892 0.098667813264281 5.8168329276664e-06 0.902528020709171 0.000583179434265342 6.10093138575265e-06
"S.LDL.L" 2.66493309834438e-30 6.68639101085607e-27 0.0306013481697191 0.00276951642103845 0 3.30129543172343e-268 0.0213866135580497 8.26363530166182e-199 0.00840235590432887 0 0 0 0 1 0.000142809459521326 1.43560744640021e-53 0.0267341246072848 2.41795645194258e-40 0.0864136598895067 0.0437891127380535 0.0561324510069301 0.688762837470605 0.814411803103387 0.899271023823828 0.235983429190724 0.0772084461755976 0.0193015516103129 0.241147318171655 8.98558183154769e-05 0.753671840920367 0.00325370471765611 8.11720909518327e-06
"S.LDL.C" 9.70018993353685e-06 2.12092697038315e-08 0.106120140199962 0.882965530056097 0.0010957216565776 0.00139766018387093 0.871380852839927 0.000947930016439725 0.834700170334087 0.000232289583917941 6.5677827800504e-05 0.000430831045349818 2.85189094390968e-05 0.000142809459521326 1 0.00205930752369393 0.160557363332944 0.00247594774016069 0.138242849086988 0.754095051925075 0.113356228863533 0.852104015832924 0.816542316842118 0.967993849909871 0.430426787356804 0.230191615473426 0.127429205607166 0.695595271208434 0.000217426498888772 0.459037071145608 0.195714349746088 2.09274839339294e-05
"IDL.L" 7.35272943164854e-119 4.84621000239705e-66 0.500414915068675 0.00126022155353679 0 0 0.00387948880621159 1.04114995608363e-202 0.00116073905853508 3.09072805267975e-134 8.88117245775499e-130 3.26220069344424e-103 4.6015129504886e-63 1.43560744640021e-53 0.00205930752369393 1 0.00050686249152922 0 0.943919759171771 0.00638602328270706 0.648066536782273 0.544341113175628 0.756892504262583 0.952058243107141 0.219642541467337 0.525365407418046 0.318638191100449 0.0944279188237141 0.000299454075778931 0.809629040225381 0.00124192327219858 0.00483128226777262
"IDL.FC" 1.25469886347292e-26 5.50716965769345e-05 0.433867167271663 0.0087411348943959 0.00517479549757927 0.00467929746717234 0.00517931830934178 0.0054602929451715 0.00161536933874262 0.0170740563159773 0.00762980784400748 0.00930044190282825 0.0144477743457746 0.0267341246072848 0.160557363332944 0.00050686249152922 1 3.89114278951707e-11 0.179627918557594 0.00194040789146231 0.215847167293996 0.306267599541574 0.396500682718792 0.790683433164234 0.714951932784869 0.752227452067471 0.813580745383877 0.255247890019389 1.90918103791881e-11 0.769962128419094 0.00155197907015123 0.00354937983423443
"IDL.C" 1.49120599233865e-82 3.65252789666454e-29 0.995013722878846 0.0019089349231611 0 0 0.00197643955354732 0 0.00174598025970437 4.9314173668886e-117 2.06249233649209e-144 2.38009913132841e-157 4.74590132427094e-43 2.41795645194258e-40 0.00247594774016069 0 3.89114278951707e-11 1 0.580529564109898 0.0135130512286368 0.853892206877942 0.36499937392336 0.544652284220752 0.955009595296017 0.387371976713864 0.758650805327652 0.329104242785474 0.0702236223502661 0.00213711964328085 0.69600395497455 7.13807555862394e-09 0.0261014004292636
"HDL.D" 0.699744816485621 0.12424936212482 0.0360293173084569 0.946075977841563 0.564046123210357 0.598248403926006 0.604305742425915 0.541868847220713 0.944185755648296 0.26402869581268 0.280970080516435 0.362158916953706 0.148854100600351 0.0864136598895067 0.138242849086988 0.943919759171771 0.179627918557594 0.580529564109898 1 0.00129677676729008 0 0.0175129067827699 0.0321204717254863 0.157230712413997 0.00158527819779028 0.0121333109148388 0.0538762249373528 1.84912578735865e-10 0.00470832360832748 4.30748720381595e-41 0.652546667221046 7.28626772045384e-12
"XL.HDL.TG" 8.45940034667567e-09 0.000416130646322746 0.564210467725519 0.0286677281596573 0.0257585601160934 0.0407150902710152 0.0462973530903962 0.081920882786899 0.080015312959582 0.0511376447606603 0.0554439596258033 0.0768116083436515 0.0211718811013113 0.0437891127380535 0.754095051925075 0.00638602328270706 0.00194040789146231 0.0135130512286368 0.00129677676729008 1 0.00812633123877435 0.0258532556848957 0.0349730446005745 0.475959551344163 0.637988887390567 0.857638439021393 0.97397688505796 3.21445229528143e-08 0.00314371469004506 0.0135977958877599 0.610883193427802 0.0414138753560902
"L.HDL.PL" 0.335687766699575 0.0190157987174307 0.0409491869724555 0.748548568251127 0.334823148829487 0.392791824484351 0.723454182492006 0.392012264231955 0.923868956779577 0.145320559585106 0.160516319380572 0.262320901659582 0.0880001062390813 0.0561324510069301 0.113356228863533 0.648066536782273 0.215847167293996 0.853892206877942 0 0.00812633123877435 1 3.84598435712894e-07 1.85931147861884e-07 9.64110032759193e-06 8.90188921616498e-14 0.329208156707023 0.601137382075897 1.94494761262491e-16 0.0100923641795621 6.61813797203052e-55 0.481639042712612 2.87937921593665e-11
"M.HDL.PL" 0.284493135372638 0.554172846947514 0.921717719358022 0.326084187110841 0.699257987748758 0.697995751580615 0.345812368510671 0.673771868568886 0.308992135991973 0.709274003420138 0.731393500061118 0.614378373307271 0.5037035343744 0.688762837470605 0.852104015832924 0.544341113175628 0.306267599541574 0.36499937392336 0.0175129067827699 0.0258532556848957 3.84598435712894e-07 1 0 0.000210930772673392 5.56159829099338e-60 0.0170732304152206 0.0759357325851767 6.60661006428985e-08 0.848712283382483 3.98329734708252e-09 0.924717777909636 0.812861053946196
"M.HDL.P" 0.384336580989651 0.78710853983646 0.923855039984447 0.882969090573302 0.894629890231283 0.893840710700631 0.826050785375392 0.874134390360356 0.799233580730295 0.878304882004098 0.91563255775943 0.809011664936468 0.583341153130892 0.814411803103387 0.816542316842118 0.756892504262583 0.396500682718792 0.544652284220752 0.0321204717254863 0.0349730446005745 1.85931147861884e-07 0 1 0 7.95673766786599e-141 7.85636062478151e-07 7.87128813659299e-05 7.6404743714872e-11 0.502068710746493 0.00118674251350129 0.762851493801487 0.999314462333492
"M.HDL.L" 0.759567693396253 0.769957660285751 0.427258918326042 0.894228430326094 0.834423401136022 0.857807946470942 0.992651167160806 0.902297503487242 0.993864538936365 0.853696032824385 0.829411937727482 0.965200287403057 0.940717820481729 0.899271023823828 0.967993849909871 0.952058243107141 0.790683433164234 0.955009595296017 0.157230712413997 0.475959551344163 9.64110032759193e-06 0.000210930772673392 0 1 1.30976036094614e-117 0.00186093840132288 0.000321870441602824 1.37516008104784e-06 0.943056670967043 0.00220876355223884 0.922852934175777 0.44395537717247
"M.HDL.CE" 0.16307584143625 0.0409211616798936 0.747431088690169 0.320395089301662 0.197736526881031 0.235825008233031 0.508586467352935 0.287647854681814 0.411076491681101 0.22269558334132 0.226943606526582 0.338711245420699 0.342951097914326 0.235983429190724 0.430426787356804 0.219642541467337 0.714951932784869 0.387371976713864 0.00158527819779028 0.637988887390567 8.90188921616498e-14 5.56159829099338e-60 7.95673766786599e-141 1.30976036094614e-117 1 0.000118981476655381 0.0088201554702209 1.11053257333646e-06 0.270498061158588 2.51955302193235e-06 0.312952837955538 0.0778697629842743
"S.HDL.P" 0.966348131796567 0.20843205218495 0.00297000893705487 0.961776642476472 0.397259879610038 0.405047043093867 0.952977012322806 0.335088956884187 0.853345118685695 0.192347854655124 0.206572186788799 0.198932193567168 0.0559409626126586 0.0772084461755976 0.230191615473426 0.525365407418046 0.752227452067471 0.758650805327652 0.0121333109148388 0.857638439021393 0.329208156707023 0.0170732304152206 7.85636062478151e-07 0.00186093840132288 0.000118981476655381 1 1.45146925213463e-43 0.135724731413858 0.209165493330348 0.976386254646894 0.749346748777612 0.00529306521000055
"S.HDL.L" 0.516997561741446 0.203362228957561 0.0104898710578341 0.739685921025484 0.172064817791207 0.161772369931576 0.789108464748536 0.102398909834216 0.577148242377711 0.0592630148661374 0.0577164807258164 0.0478633213178408 0.0101664776861892 0.0193015516103129 0.127429205607166 0.318638191100449 0.813580745383877 0.329104242785474 0.0538762249373528 0.97397688505796 0.601137382075897 0.0759357325851767 7.87128813659299e-05 0.000321870441602824 0.0088201554702209 1.45146925213463e-43 1 0.254497688972829 0.164358458511884 0.621873200369165 0.36017216070165 0.379093931974631
"ApoA1" 0.275072936159976 0.263407055608077 0.182630293613041 0.274942780373332 0.170727799557182 0.175625434582412 0.193998480425101 0.199747265943898 0.304626218760805 0.205410989649019 0.191105786739836 0.18324701528016 0.098667813264281 0.241147318171655 0.695595271208434 0.0944279188237141 0.255247890019389 0.0702236223502661 1.84912578735865e-10 3.21445229528143e-08 1.94494761262491e-16 6.60661006428985e-08 7.6404743714872e-11 1.37516008104784e-06 1.11053257333646e-06 0.135724731413858 0.254497688972829 1 0.514724740145817 2.04709420472537e-26 0.50236088965818 0.742279409052002
"ApoB" 2.41615868162892e-17 1.24835173852787e-21 0.323252163388976 0.00242293572120254 0.000992408259078612 0.00272616282163844 0.0102520022938655 0.00750732431456802 0.00672290185568 0.000599712684207198 0.000511323896886885 0.00207425431281293 5.8168329276664e-06 8.98558183154769e-05 0.000217426498888772 0.000299454075778931 1.90918103791881e-11 0.00213711964328085 0.00470832360832748 0.00314371469004506 0.0100923641795621 0.848712283382483 0.502068710746493 0.943056670967043 0.270498061158588 0.209165493330348 0.164358458511884 0.514724740145817 1 0.0689717913917743 2.66562399781509e-36 3.47921469748037e-19
"HDL.C" 0.29042737681044 0.234538951733472 0.464646057487827 0.283761760257198 0.913601174903833 0.843783691372629 0.157352492806031 0.810447385561189 0.265223233692039 0.975248602894954 0.97255787868089 0.805427752975722 0.902528020709171 0.753671840920367 0.459037071145608 0.809629040225381 0.769962128419094 0.69600395497455 4.30748720381595e-41 0.0135977958877599 6.61813797203052e-55 3.98329734708252e-09 0.00118674251350129 0.00220876355223884 2.51955302193235e-06 0.976386254646894 0.621873200369165 2.04709420472537e-26 0.0689717913917743 1 0.972244502707628 1.07129458257788e-05
"LDL.C" 1.23165804441325e-07 7.38066086325758e-06 0.6046434509302 0.000610840305756798 0.00159093287638858 0.001695126908862 0.000105660116825547 0.00170713265064634 0.000308421029949231 0.0016185990806446 0.000582426960440924 0.00122751515449887 0.000583179434265342 0.00325370471765611 0.195714349746088 0.00124192327219858 0.00155197907015123 7.13807555862394e-09 0.652546667221046 0.610883193427802 0.481639042712612 0.924717777909636 0.762851493801487 0.922852934175777 0.312952837955538 0.749346748777612 0.36017216070165 0.50236088965818 2.66562399781509e-36 0.972244502707628 1 0.0880324152328836
"TG" 3.10958765846123e-07 1.98824239828311e-15 0.0215005082209998 0.181616230560414 0.00373162660076808 0.00952313197122874 0.557705663607759 0.0157848155440087 0.270930657286227 0.000656364710968336 0.00106199492522889 0.00491401252826732 6.10093138575265e-06 8.11720909518327e-06 2.09274839339294e-05 0.00483128226777262 0.00354937983423443 0.0261014004292636 7.28626772045384e-12 0.0414138753560902 2.87937921593665e-11 0.812861053946196 0.999314462333492 0.44395537717247 0.0778697629842743 0.00529306521000055 0.379093931974631 0.742279409052002 3.47921469748037e-19 1.07129458257788e-05 0.0880324152328836 1
