# Supplementary figures and images for: A Mendelian randomization study of the role of lipoprotein subfractions in coronary artery disease
Source: eLife journal article supplement (doi:10.7554/elife.58361), 2021-04-26

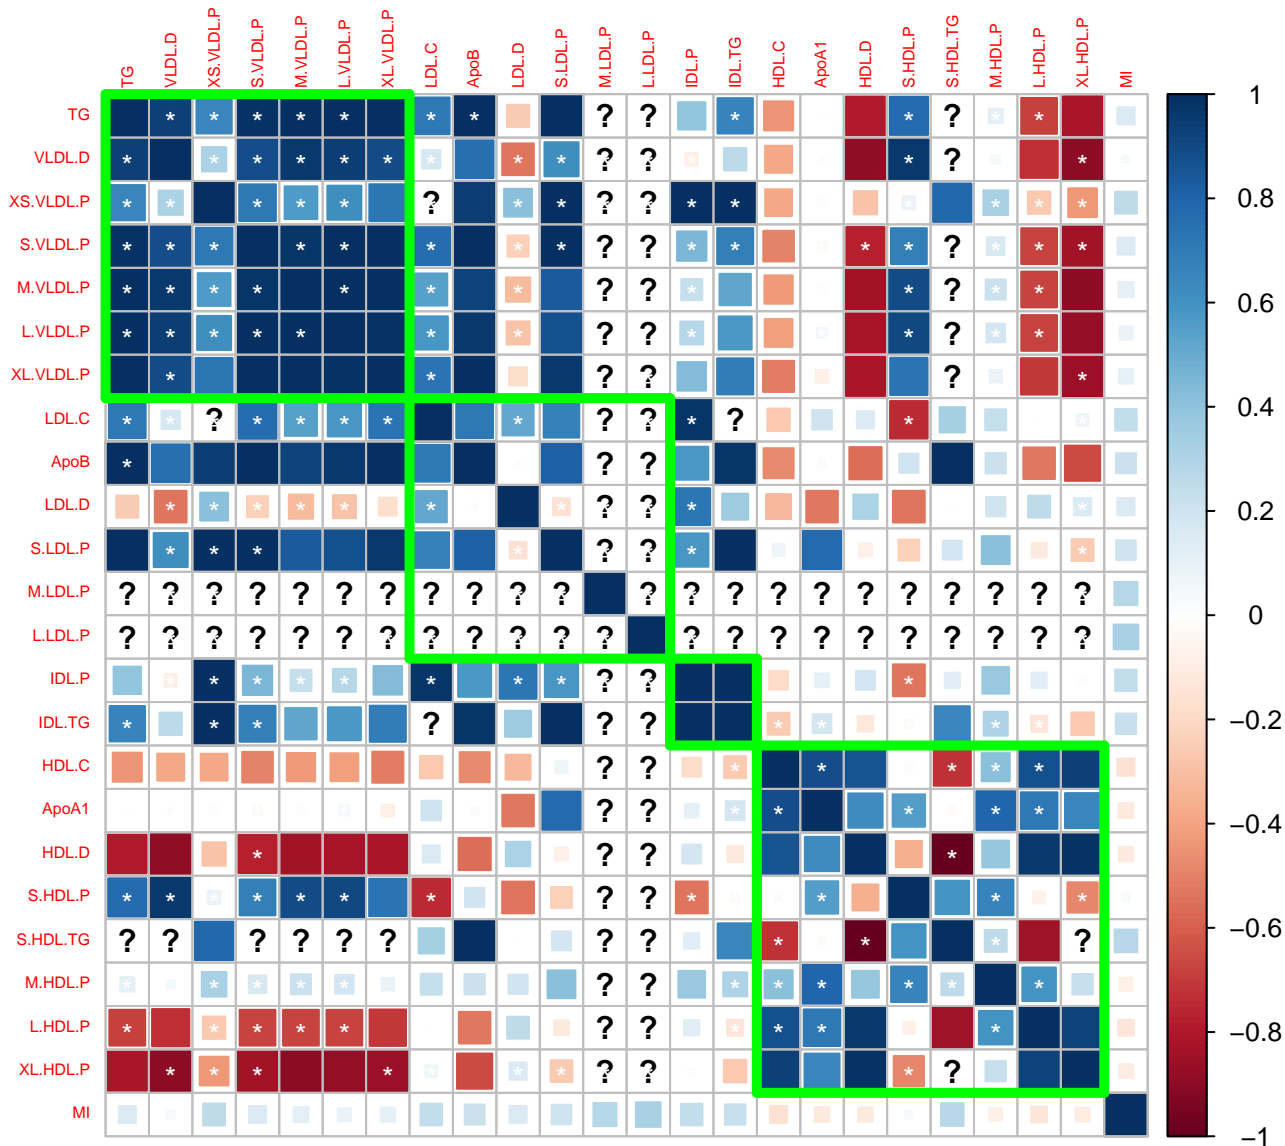

Supplement: supp [file elife-58361-supp-v1.zip › elife_poa_e58361_Appendix_2_figure_1.pdf]

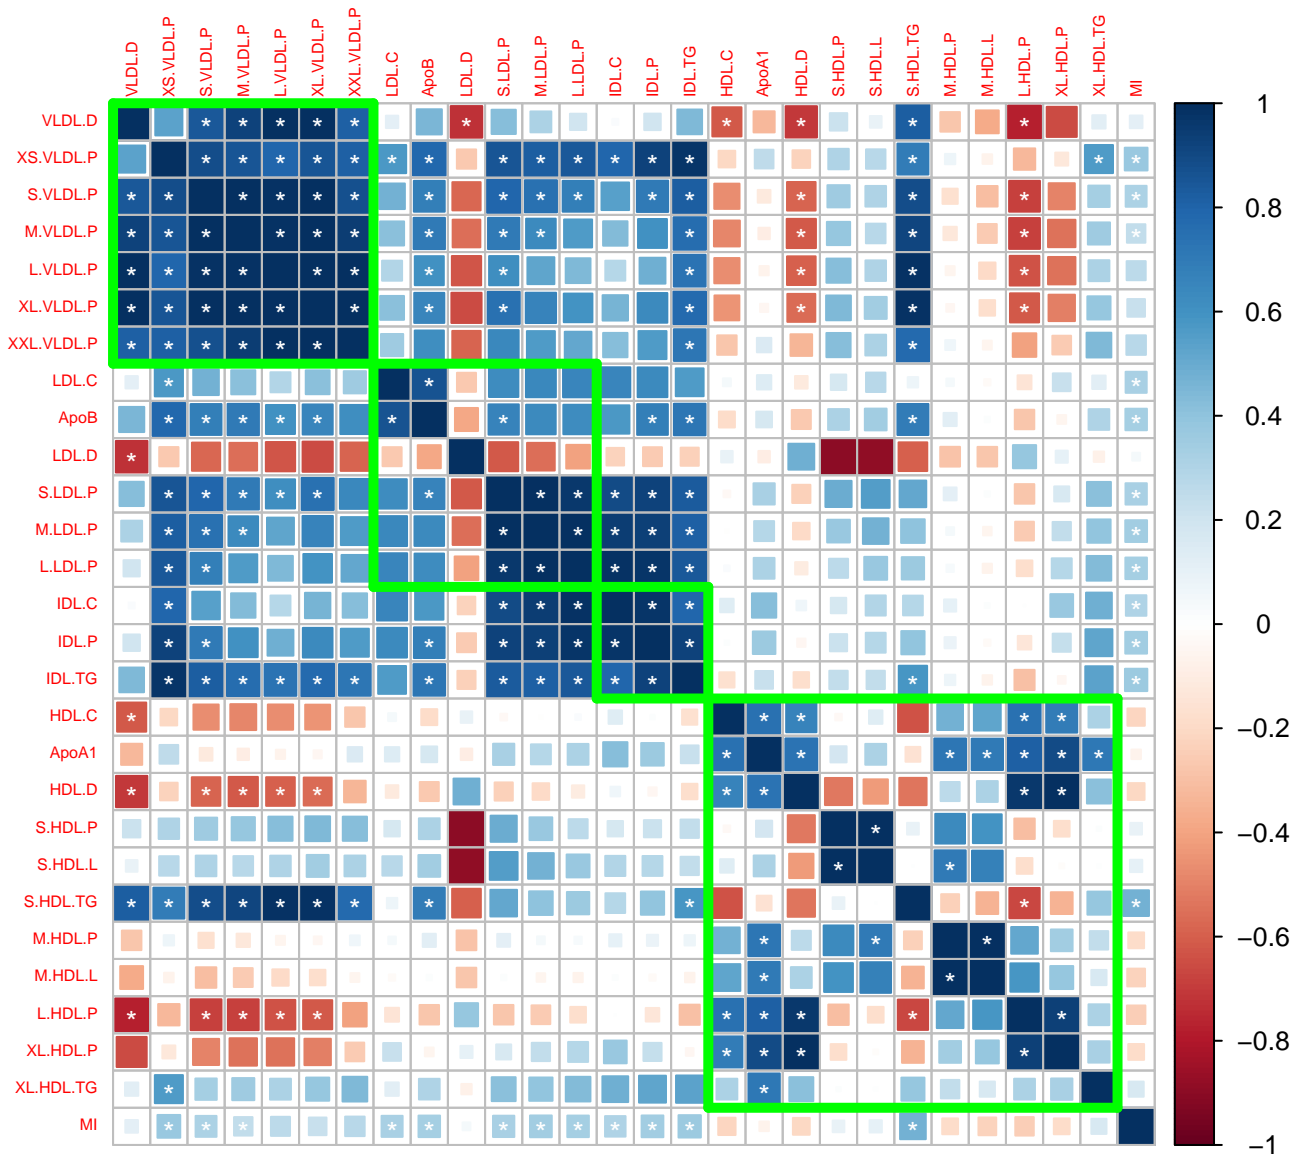

Supplement: supp [file elife-58361-supp-v1.zip › elife_poa_e58361_Appendix_2_figure_2.pdf]

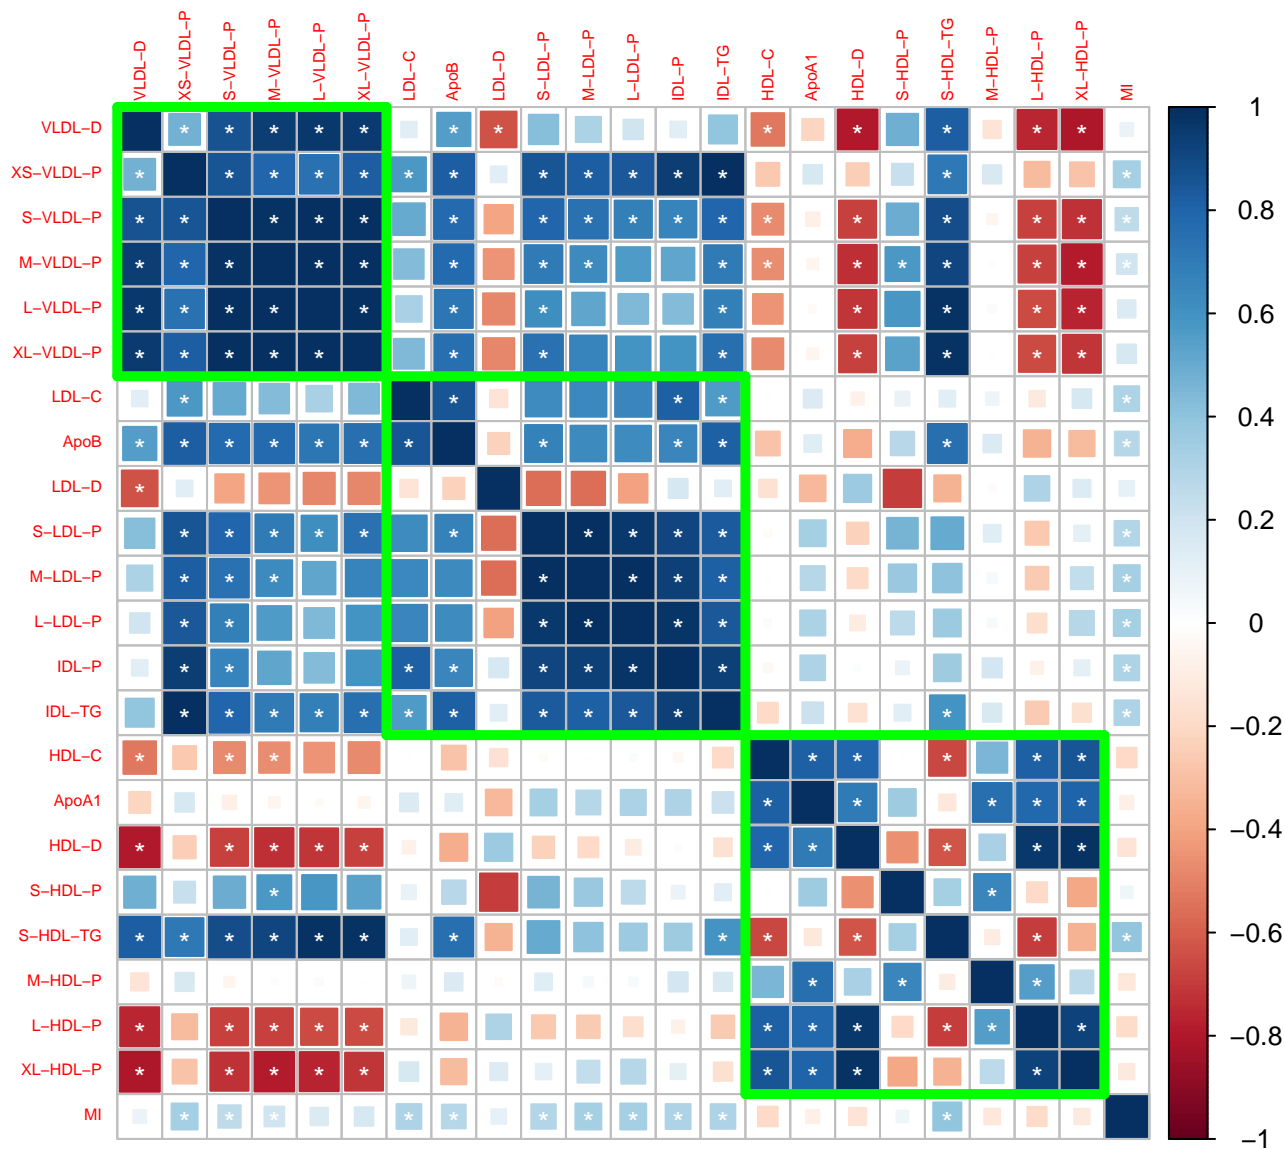

Supplement: supp [file elife-58361-supp-v1.zip › elife_poa_e58361_Appendix_2_figure_1.pdf]

## Univariable

## Adjusted for ApoA1, ApoB, TG

## Adjusted for HDL-C, LDL-C, TG

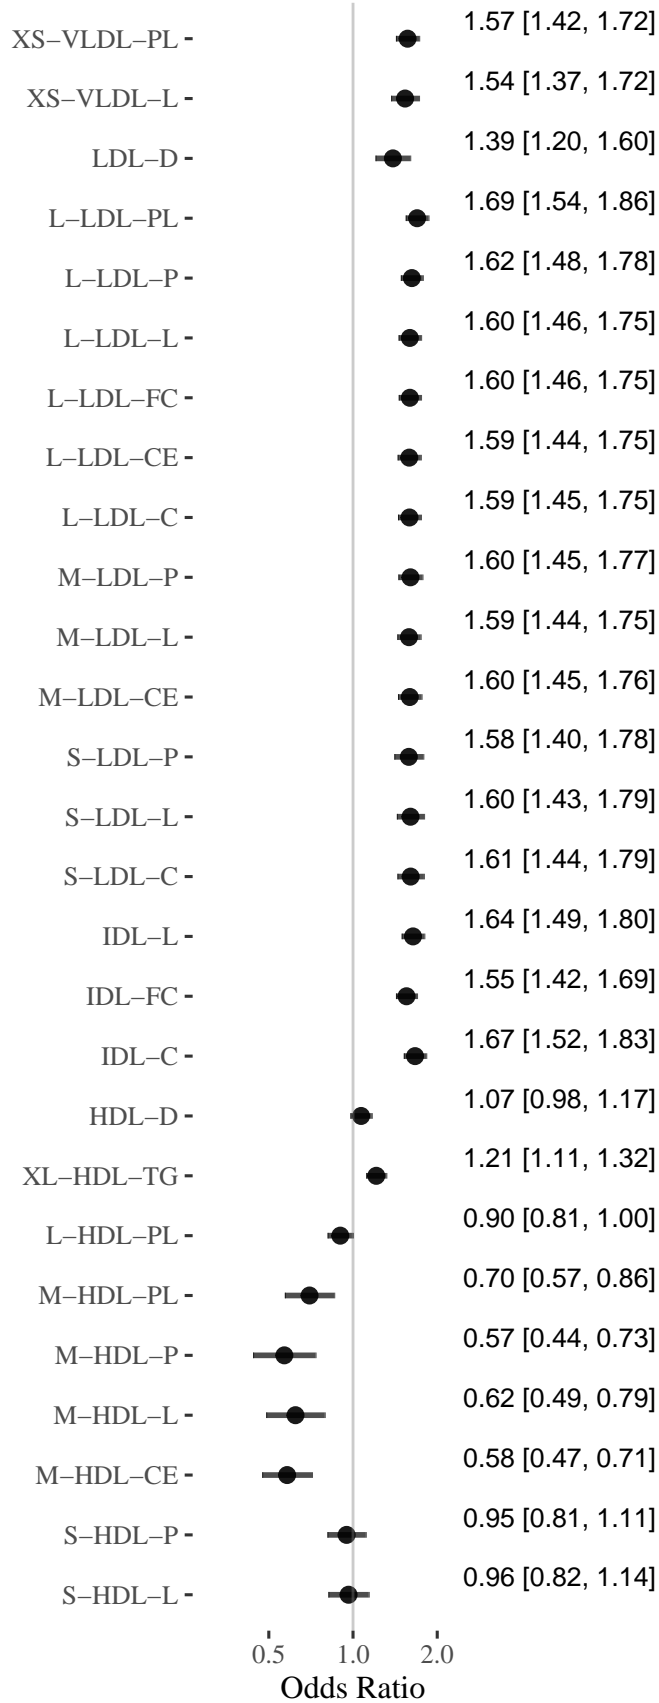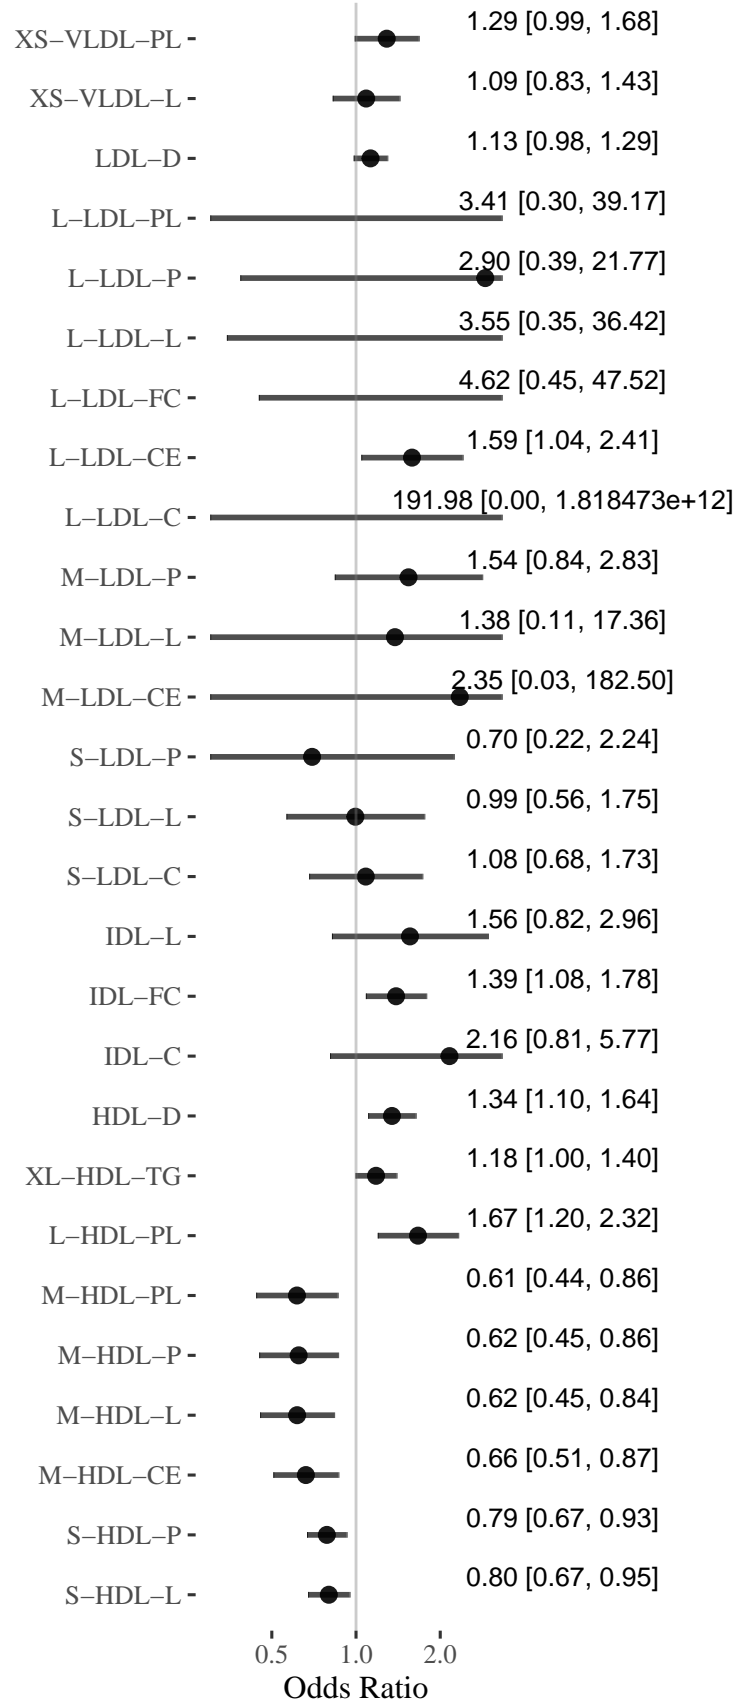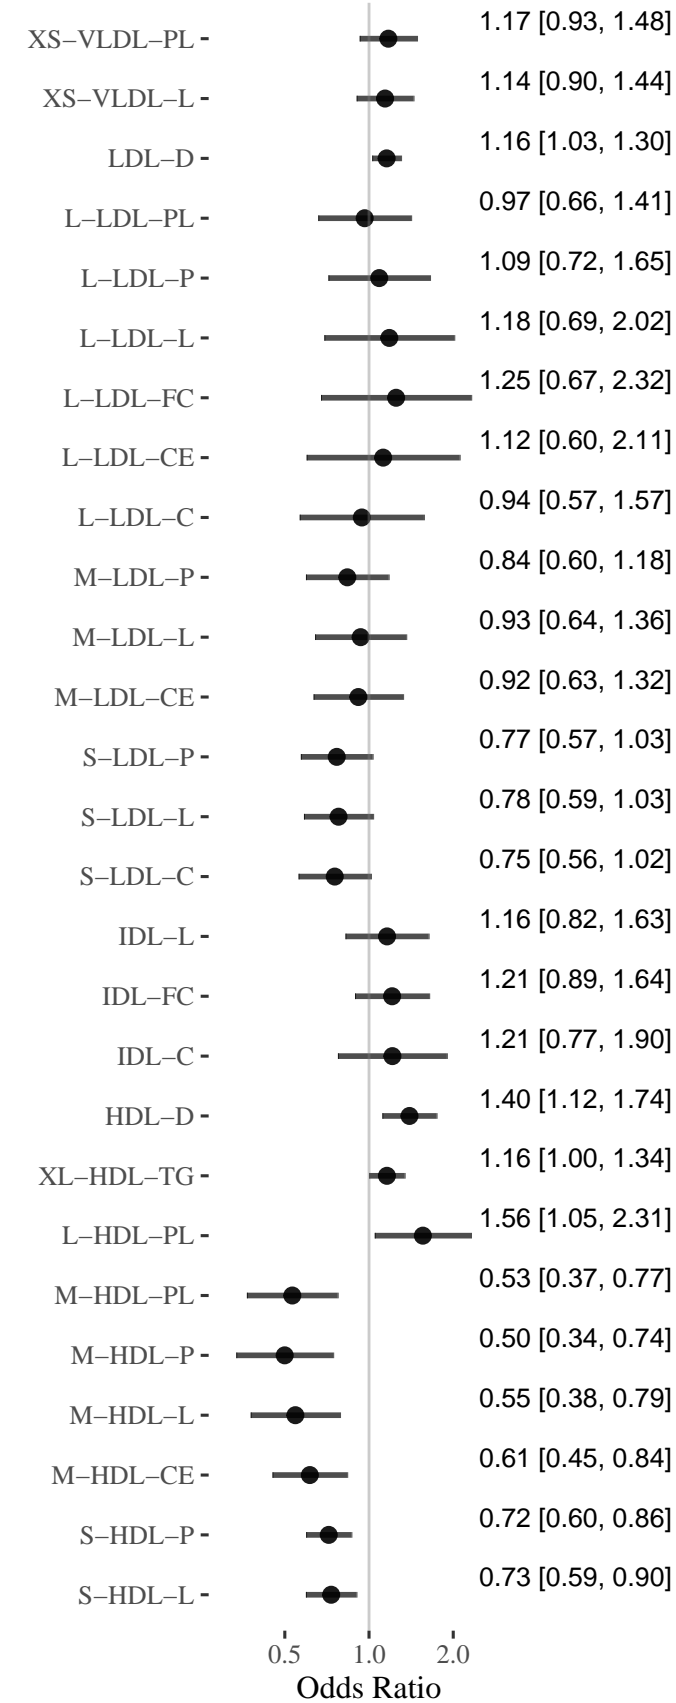

Supplement: supp [file elife-58361-supp-v1.zip › elife_poa_e58361_Appendix_3_figure_1.pdf]

Standardized residual

Heterogeneity p-value: 0.38

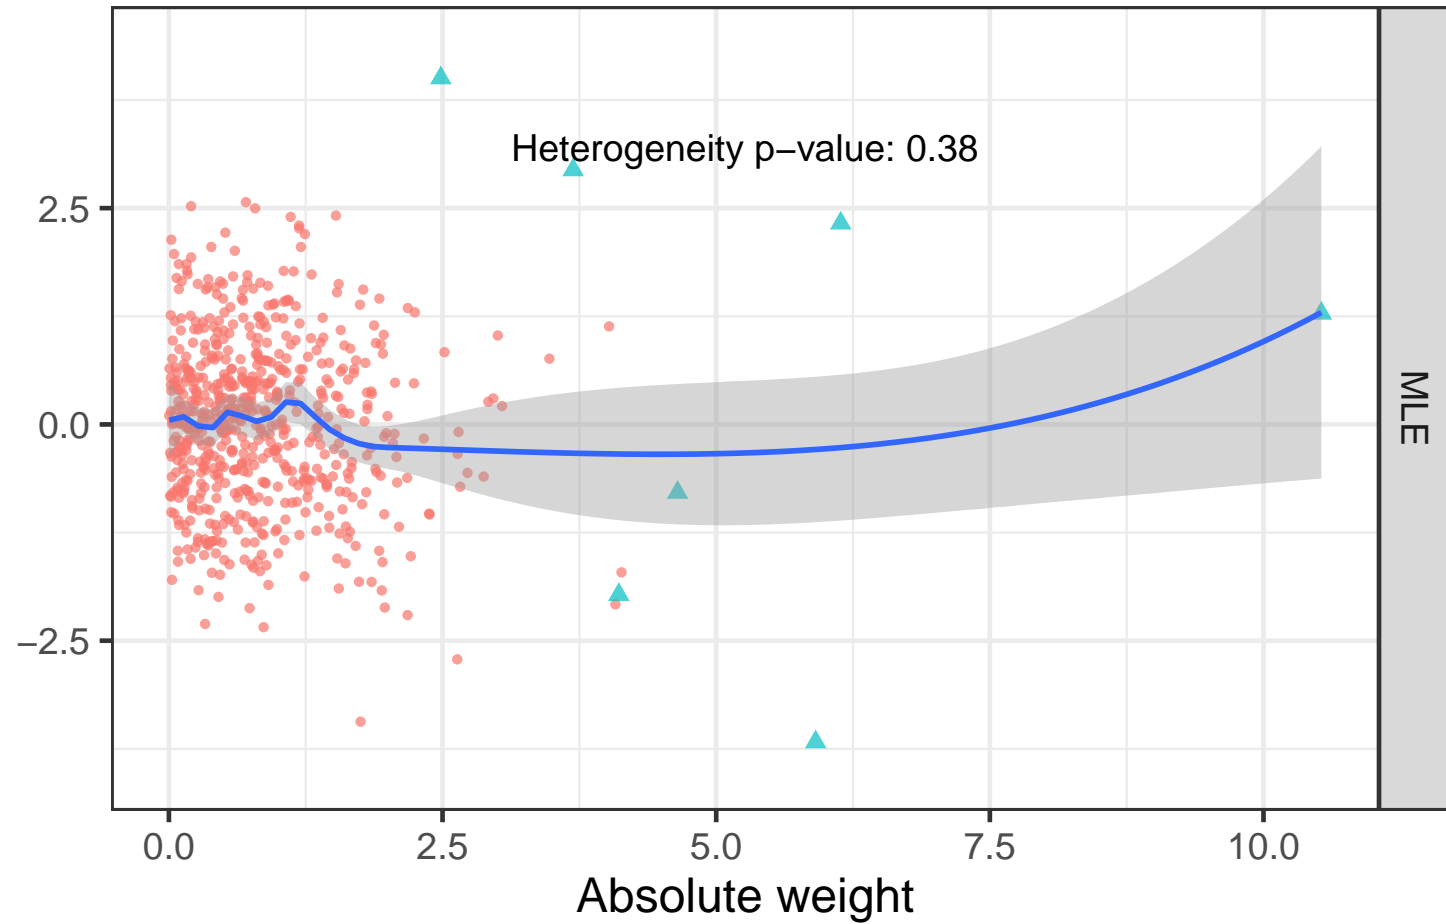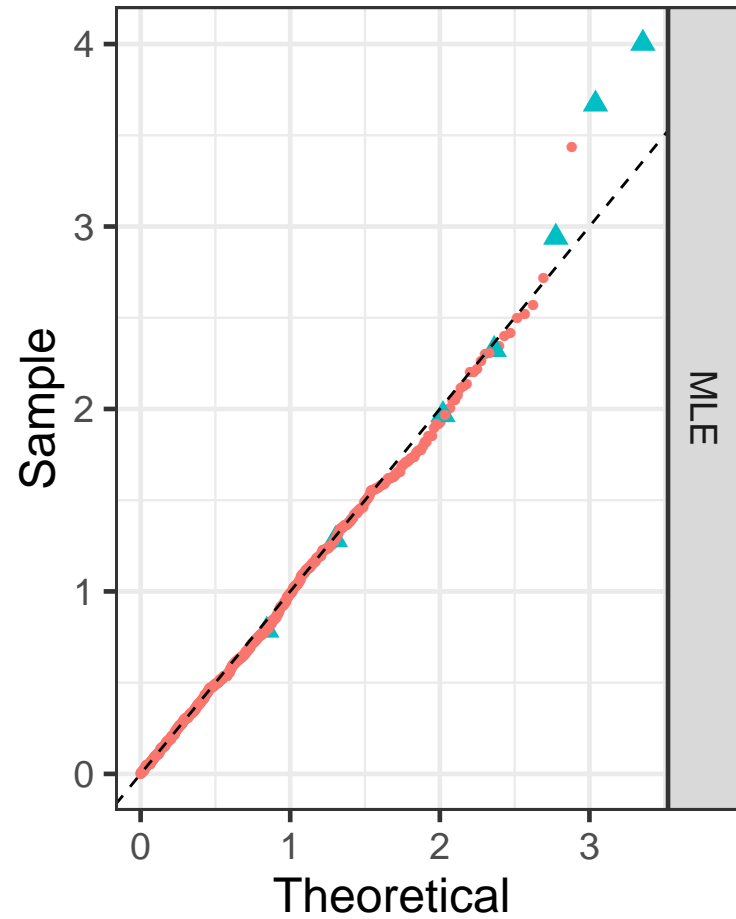

Supplement: supp [file elife-58361-supp-v1.zip › elife_poa_e58361_Appendix_4_figure_1.pdf]

Standardized residual

Heterogeneity p-value: 0.63

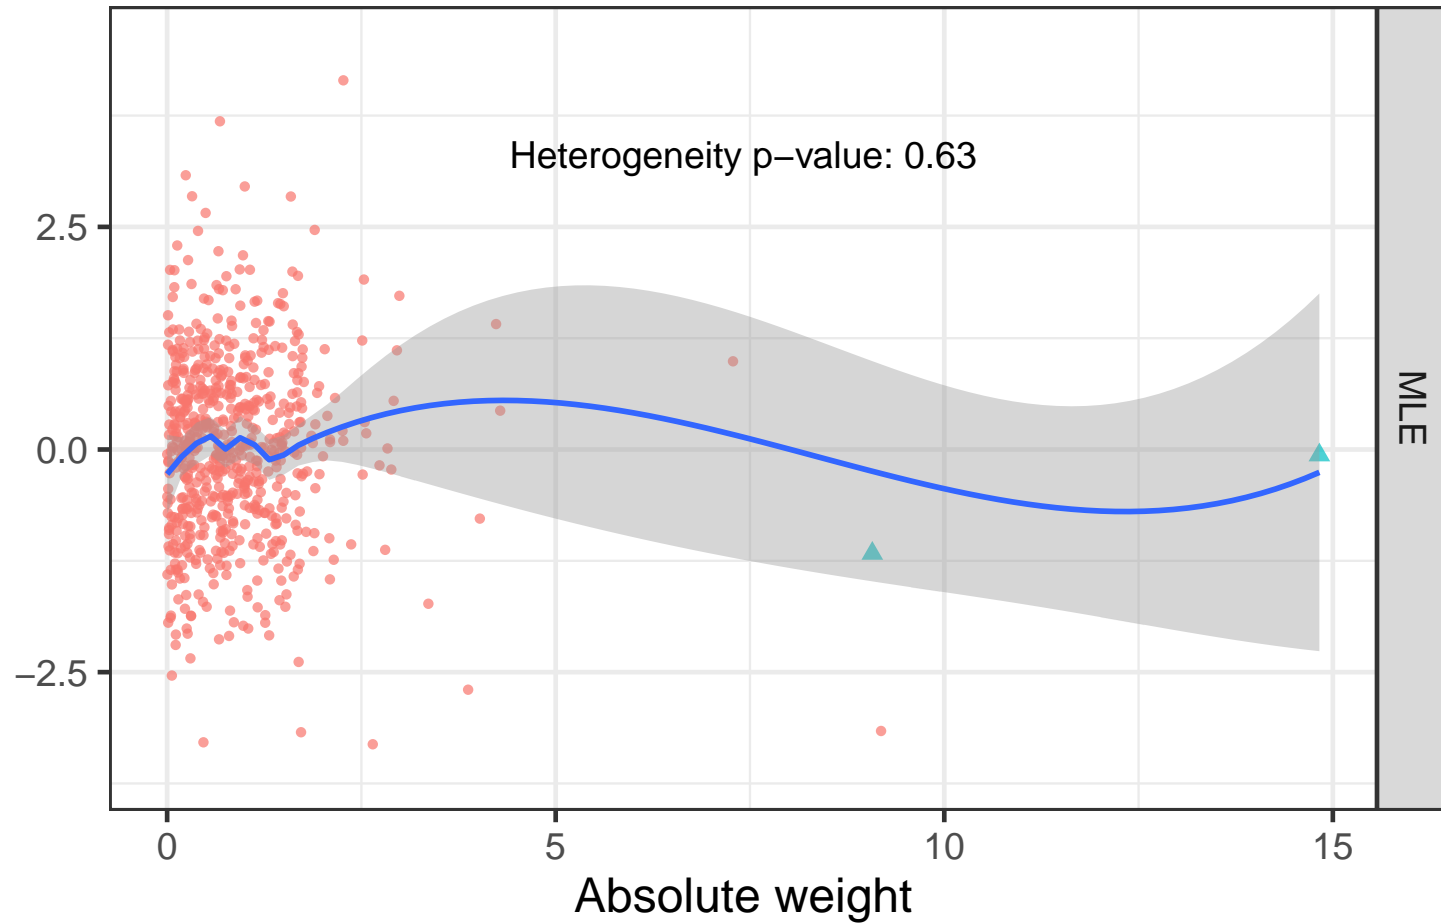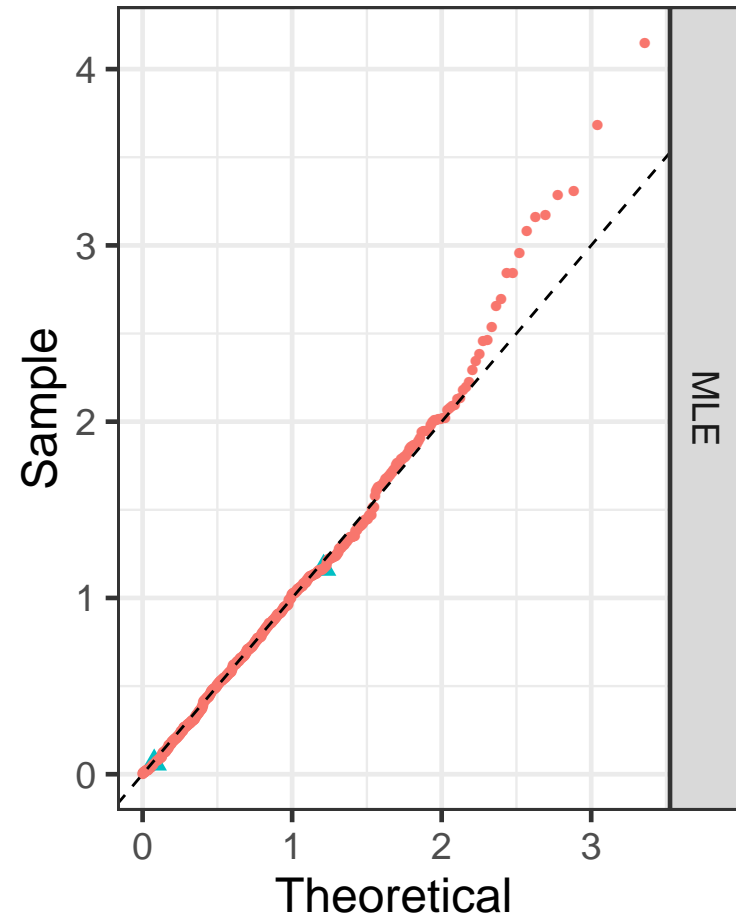

Supplement: supp [file elife-58361-supp-v1.zip › elife_poa_e58361_Appendix_4_figure_2.pdf]

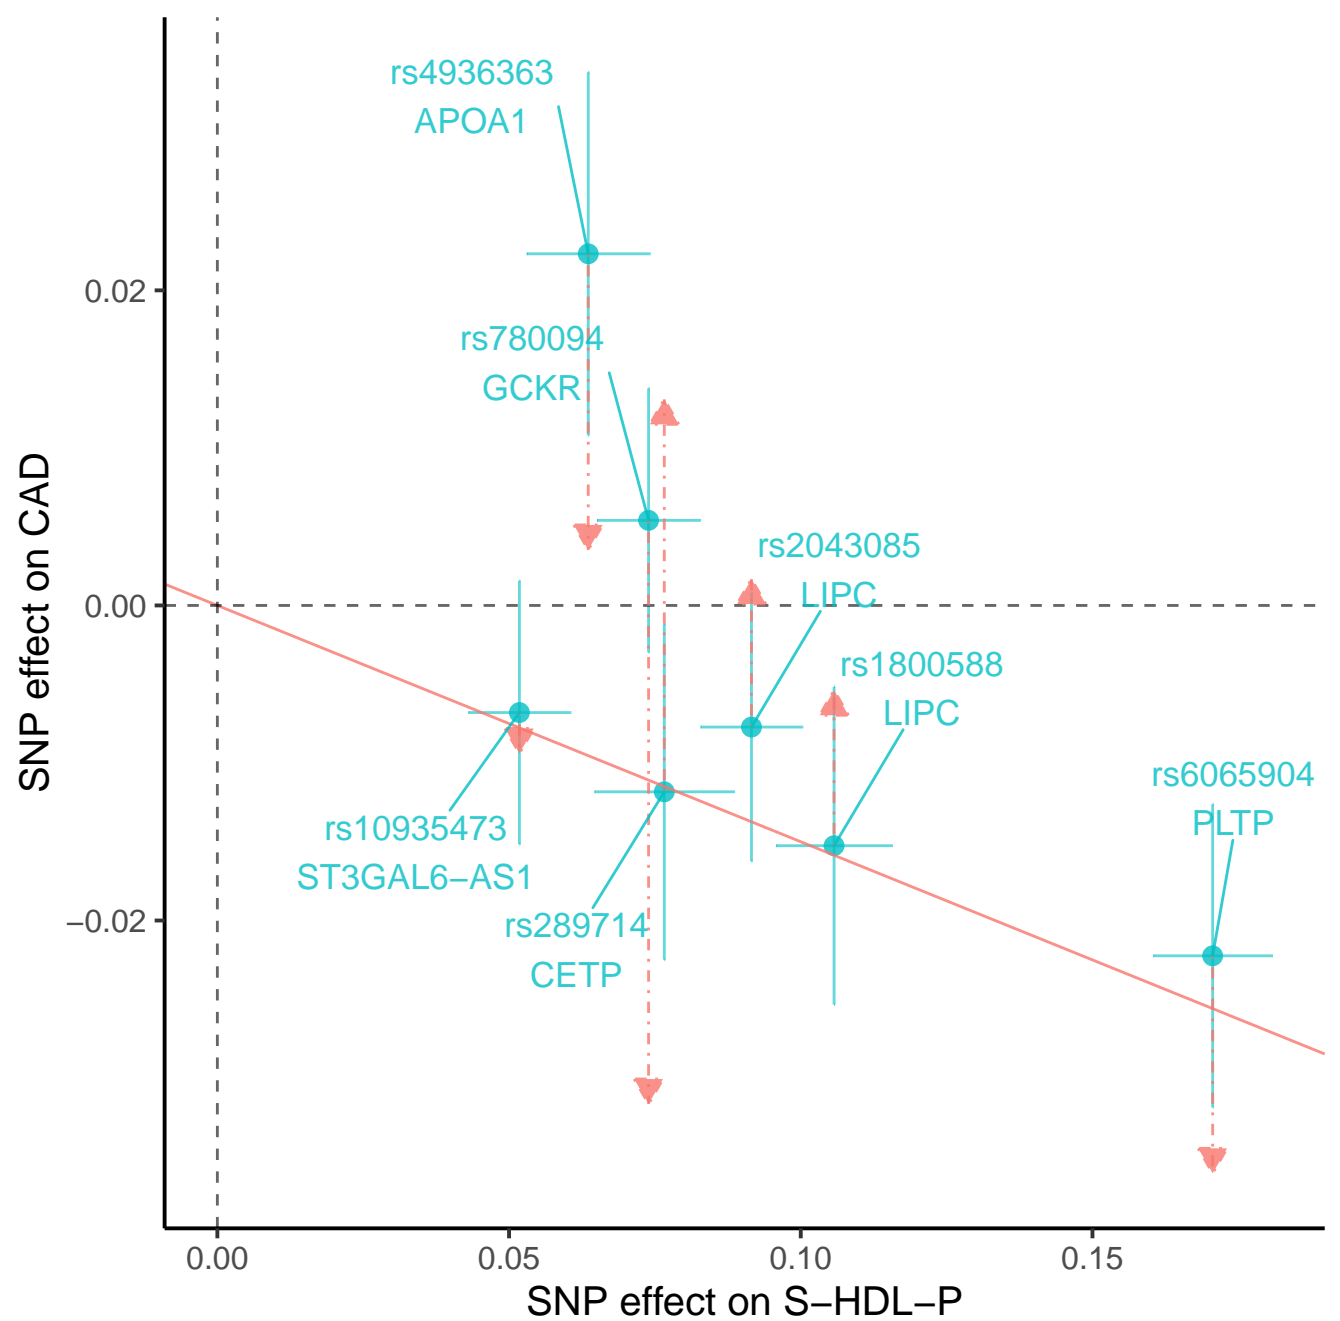

Supplement: supp [file elife-58361-supp-v1.zip › elife_poa_e58361_Appendix_4_figure_3.pdf]

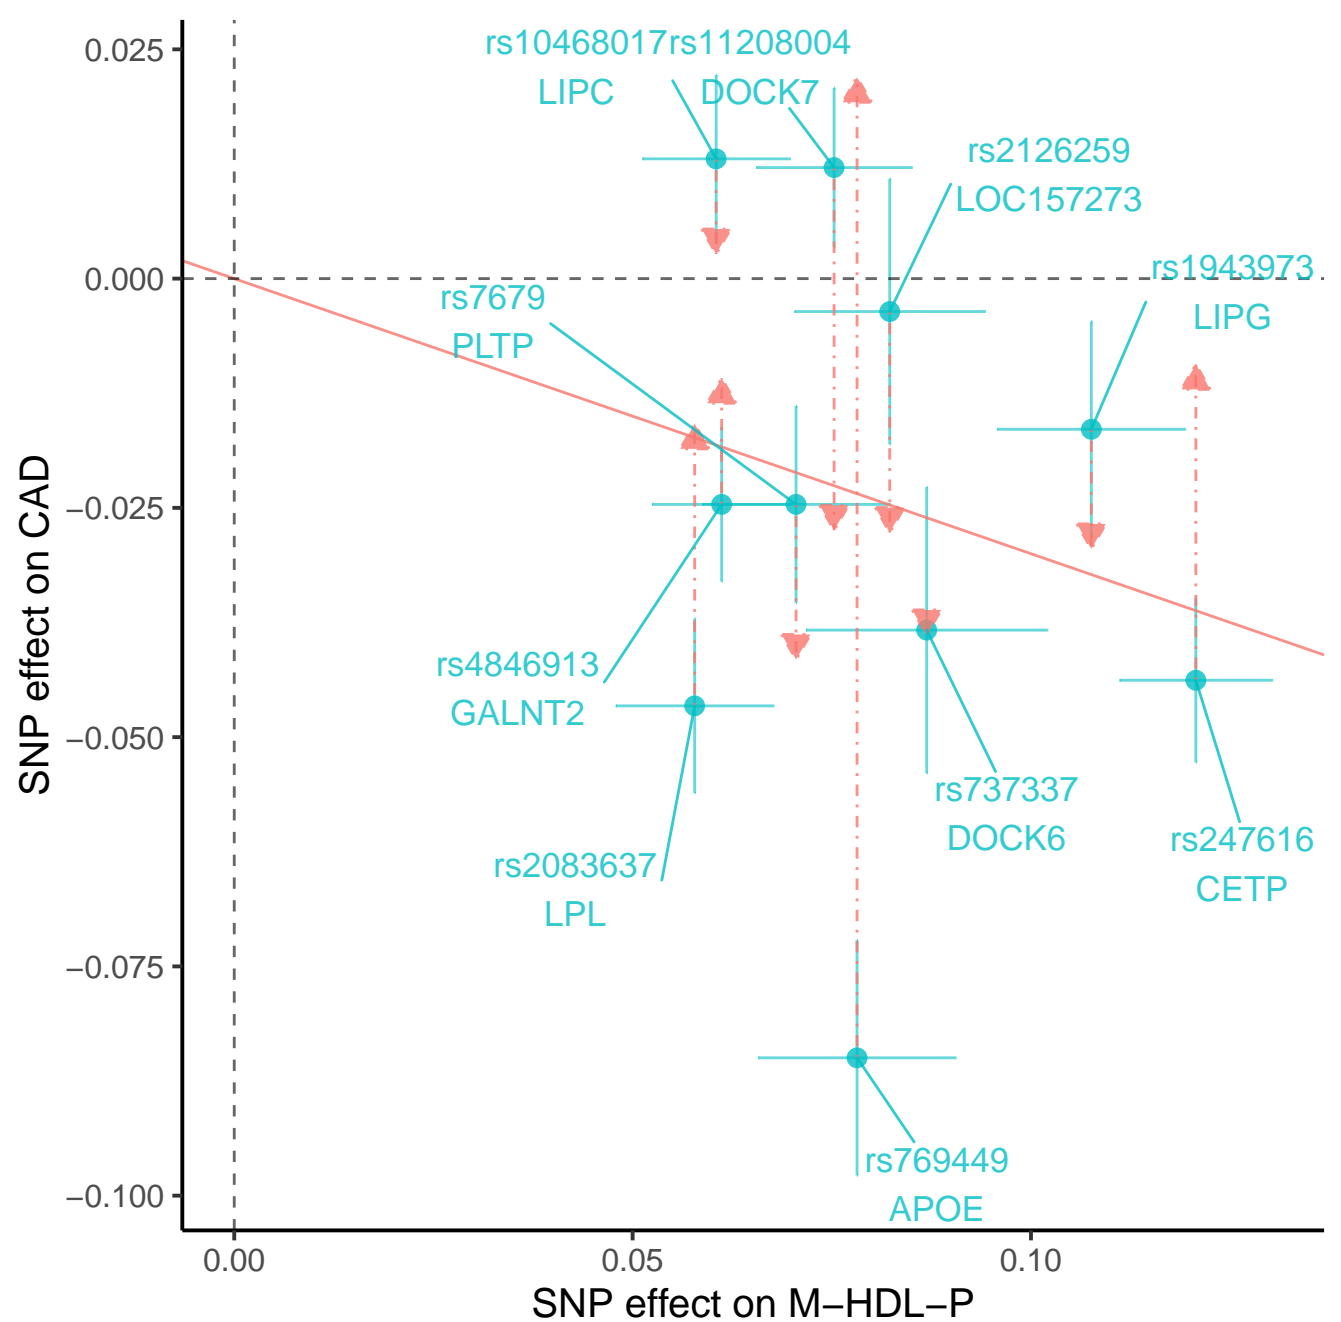

Supplement: supp [file elife-58361-supp-v1.zip › elife_poa_e58361_Appendix_4_figure_4.pdf]
